# Supplementary material for: Network Pharmacology-Based Systematic Analysis of Molecular Mechanisms of Dingji Fumai Decoction for Ventricular Arrhythmia
Source: Hindawi journal article supplement (doi:10.1155/2021/5535480), 2021-05-08
Supplement: f1 [file 5535480.f1.zip]

**Figure S1. Molecular docking modules.**

## CALM1

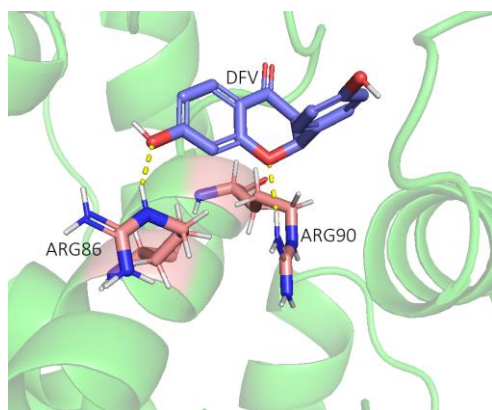

DFV- CALM1

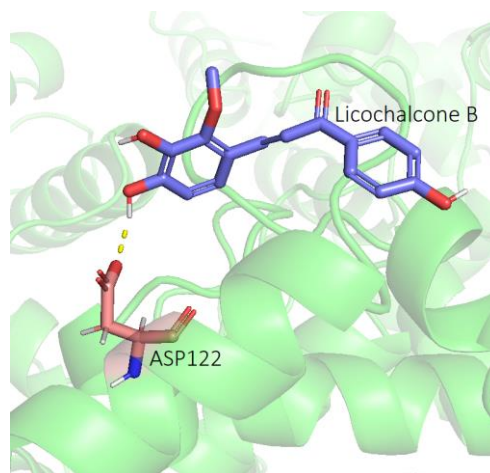

Licochalcone B- CALM1

## KCNH2

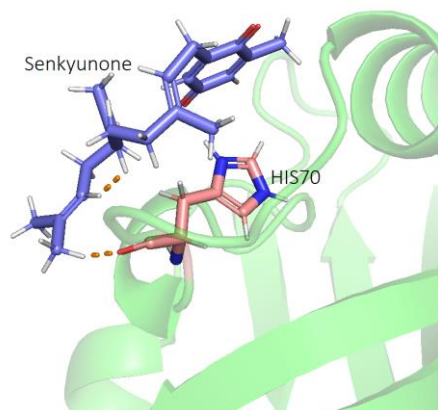

Senkyunone-KCNH2

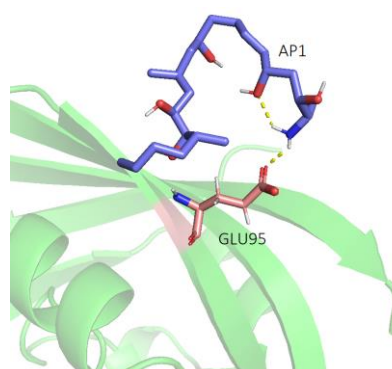

AP1- KCNH2

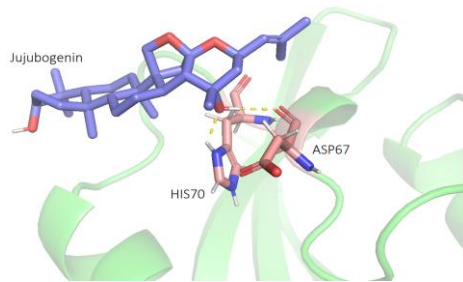

Jujubogenin-KCNH2

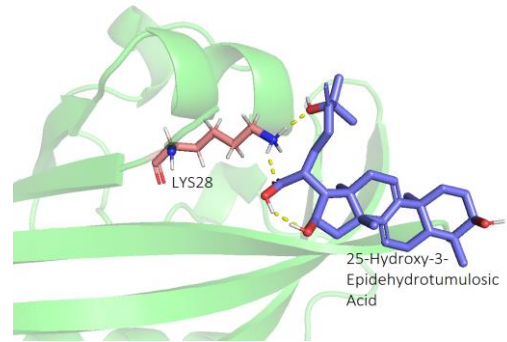

25-Hydroxy-3-Epidehyrotumulosic Acid

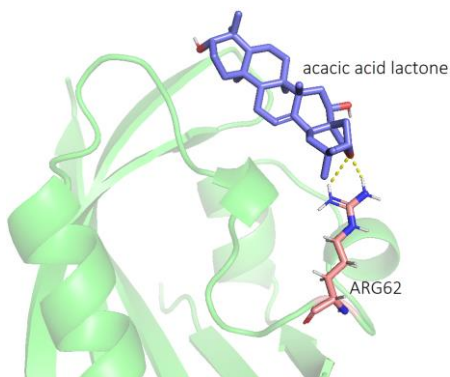

Acacic acid lactone-KCNH2

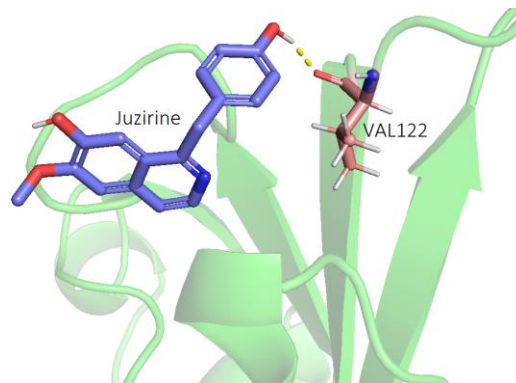

Juzirine-KCNH2

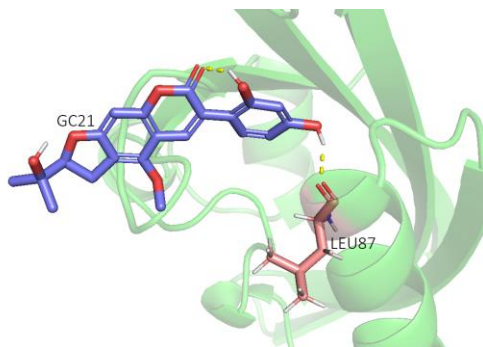

GC21-KCNH2

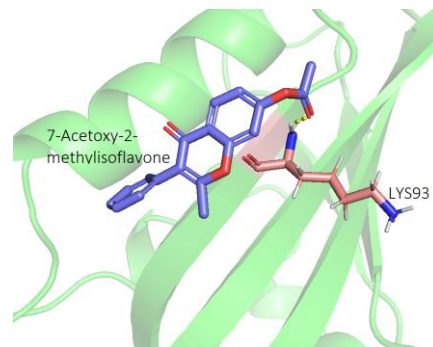

7-Acetoxy-2-methylisoflavone-KCNH2

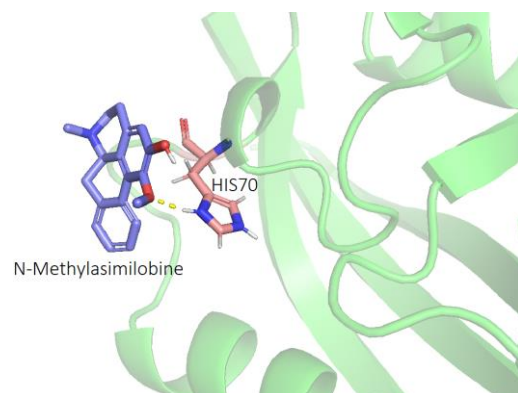

N-Methylasimilobine-KCNH2

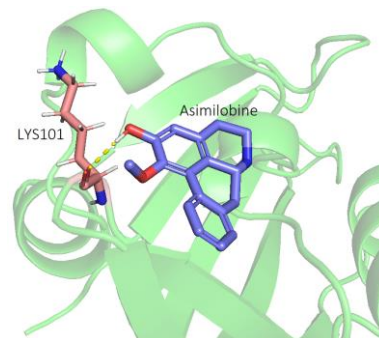

Asimilobine-KCNH2

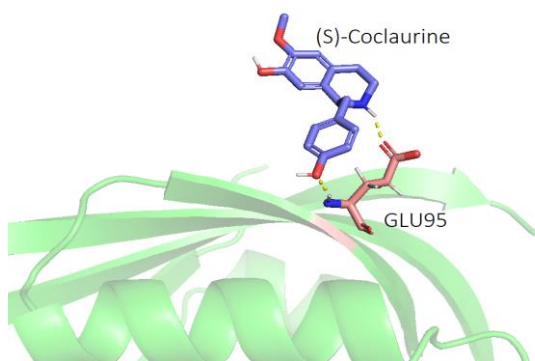

(S)-Coclaurine-KCNH2

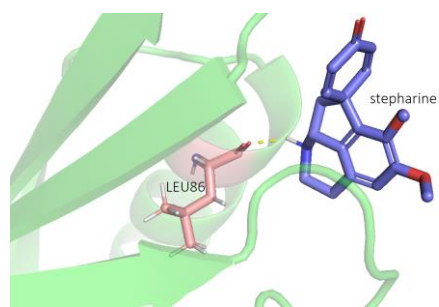

Stepharine-KCNH2

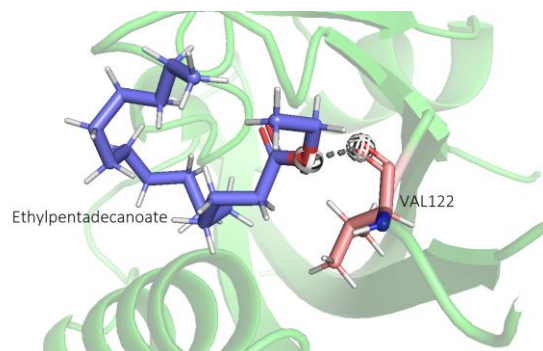

Ethylpentadecanoate-KCNH2

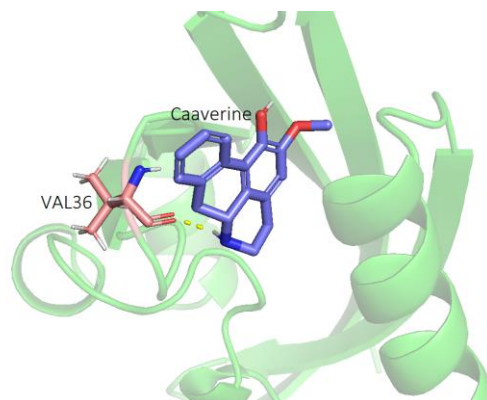

Caaverine-KCNH2

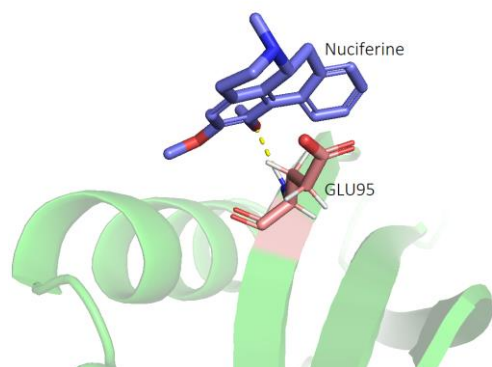

Nuciferine-KCNH2

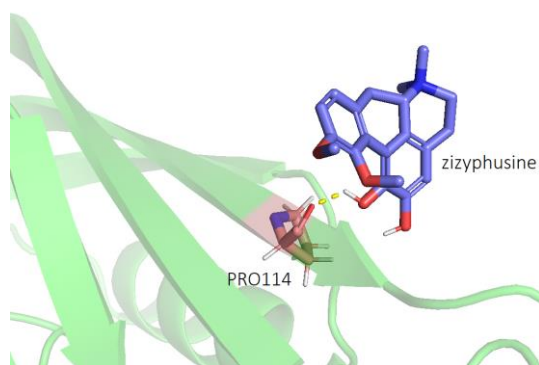

Zizyphusine-KCNH2

## SCN5A

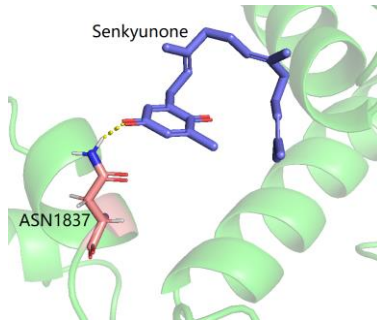

Senkyunone-SCN5A

## TNNT2

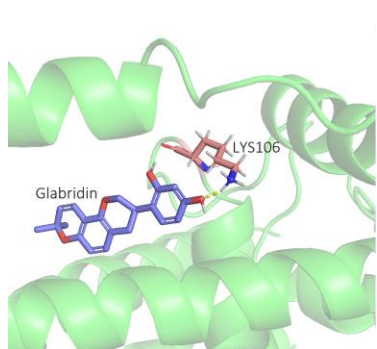

Glabridin-TNNT2

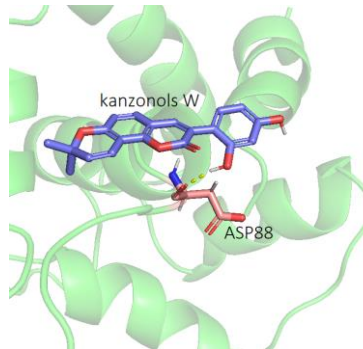

kanzonols W-TNNT2

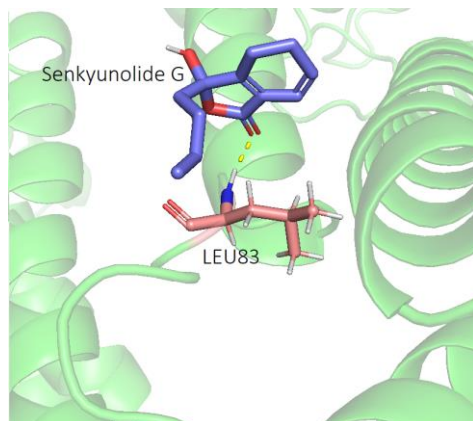

Senkyunolide G-TNNT2

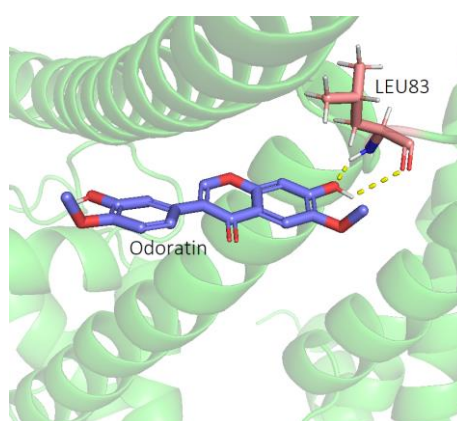

Odoratin-TNNT2
