# Supplementary material for: Network Pharmacology-Based Systematic Analysis of Molecular Mechanisms of Dingji Fumai Decoction for Ventricular Arrhythmia
Source: Evid Based Complement Alternat Med. 2021 May 8;2021:5535480. doi: 10.1155/2021/5535480 (PMC8128550; doi:10.1155/2021/5535480)
Supplement: Supplementary Materials — Table S1: comparison of Chinese medicine names and Latin names. Table S2: details of qualified compounds in various herbs. Figure S1: molecular docking modules. [file 5535480.f1.zip]

Archive with 3 entries (3 files):
- 5535480.f1/Figure S1. Molecular docking modules.pdf
- 5535480.f1/Table S2.docx
- 5535480.f1/Tbale S1.docx
